TEMPERATURE-SENSITIVE MUTANTS FOR THE REPLICATION  
OF PLASMIDS IN *ESCHERICHIA COLI*  
I. ISOLATION AND SPECIFICITY OF HOST AND  
PLASMID MUTATIONS<sup>1</sup>

DAVID T. KINGSBURY<sup>2</sup> AND DONALD R. HELINSKI

*Department of Biology, University of California, San Diego, La Jolla, California 92037*

Manuscript received November 6, 1972

Revised copy received January 26, 1973

Transmitted by P. E. HARTMAN

ABSTRACT

Temperature-sensitive mutants of *Escherichia coli* defective in the replication of the plasmid colicinogenic factor E1 (*ColE*<sub>1</sub>) were isolated following mutagenesis of *E. coli* K12 strain carrying the *ColE*<sub>1</sub> factor. Following the mutagenic treatment an enrichment procedure utilizing the replacement of thymine with bromouracil in the *ColE*<sub>1</sub> DNA duplicated at the restrictive temperature was used. The mutants isolated following this enrichment step were the result of a mutation event either in the host chromosome or in the *ColE*<sub>1</sub> plasmid. The host mutants fell into three phenotypic classes based on the effect each mutation had on the maintenance of a variety of other extrachromosomal DNA elements. Phenotypic class I mutations affected all *E. coli* plasmids, both the I and F sex factor types as well as the *ColE*<sub>1</sub> factor. Phenotypic class II mutations affected the maintenance of the *ColE*<sub>1</sub> and the F sex factor type plasmids and not the I type, while phenotypic class III mutations affected only *ColE*<sub>1</sub> replication. None of these mutations was found to have a significant effect on the replication of the *E. coli* chromosome. The plasmid-linked mutations fell into two phenotypic classes on the basis of the ability of the *Flac* episome to complement the mutation in the *ColE*<sub>1</sub> plasmid.

A property common to all the extrachromosomal elements (plasmids) of *Escherichia coli* is the capability of autonomous replication followed by the distribution of plasmid molecules to the daughter cells during cellular division. The number of copies in a cell population is carefully controlled and the rate of segregation of cells without the plasmid DNA is very low for the sex factors and rare for most non-sex factor plasmids.

The mechanism of this replication and segregation of plasmid DNA has been a subject which has received much attention in the past few years. JACOB, BRENNER and CUZIN (1963) postulated that every autonomous unit of replication should be considered a replicon, a replication unit carrying one or more genes

<sup>1</sup> Research was supported by Public Health Service Research Grant AI-07194 and National Science Foundation research grant GB-29492. D.R.H. is a Public Health Service Career Development Awardee (K04-6M07821). D.T.K. was a recipient of a Smith, Kline and French Laboratories Predoctoral Fellowship.

<sup>2</sup> Present address: Department of Medical Microbiology, College of Medicine, University of California, Irvine, Irvine, California 92664.

that control its own replication. In support of the replicon hypothesis properties of a series of temperature-sensitive replication mutants of an *Flac* factor were described (CUZIN and JACOB 1967). Certain of these mutations were located on the *Flac* factor and could be complemented by the presence of a normal *Fgal* factor. In the same study (CUZIN and JACOB 1967) the authors reported the isolation of plasmid replication mutants that map on the *E. coli* chromosome. These mutants have been shown to specifically affect the replication of *Flac* or *Fgal* factors but not an F-type *R* factor (HIROTA *et al.* 1968). The gene products involved in these mutations have not been identified, but it is clear from these studies that the genetic control of these extrachromosomal replicons lies both on the bacterial chromosome and on the plasmid DNA.

The colicinogenic factor  $E_1$  ( $ColE_1$ ) is a plasmid element lacking sex-factor properties. The  $ColE_1$  DNA molecule has a molecular weight of  $4.2 \times 10^6$  daltons and in contrast to the *E. coli* sex factors, exists in the cells in multiple copies (BAZARAL and HELINSKI 1968). The  $ColE_1$  factor can be isolated as either a supercoiled circular DNA molecule or as a relaxation complex of supercoiled DNA and protein (CLEWELL and HELINSKI 1969, 1970). Unlike the *E. coli* sex factors, these plasmid molecules are unable to promote either their own conjugal transfer from cell to cell or the transfer of chromosomal DNA. The transfer of the  $ColE_1$  factor, however, can be promoted by a sex factor present in the same cell.

The role of chromosomal genes in controlling the replication of factors of the  $ColE_1$  type is poorly understood. GOEBEL (1970) has shown that a *dnaA* (initiation) mutation, known to affect chromosomal DNA synthesis, causes a rapid cessation of  $ColE_1$  synthesis when shifted to the non-permissive temperature. A *dnaB* (chain elongation) mutant was found to synthesize  $ColE_1$  DNA at a diminishing rate under conditions where chromosomal DNA synthesis is immediately shut off (GOEBEL 1970). In a study of plasmid replication in the *E. coli* *polA1* mutant (DNA polymerase I) of *E. coli*, it was shown that the  $ColE_1$  and  $ColE_2$  factors required DNA polymerase I for their normal maintenance (KINGSBURY and HELINSKI 1970). The maintenance of various sex-factor plasmids was unaffected in this mutant (KINGSBURY and HELINSKI 1970; D. KINGSBURY and D. HELINSKI, submitted for publication).

In the present study mutations were induced in an *E. coli* strain carrying the  $ColE_1$  plasmid that resulted in defective replication of the  $ColE_1$  plasmid at a non-permissive temperature. The mutations were located either on the host chromosome, or on the  $ColE_1$  plasmid. The specificity of these mutations with respect to their effect on the maintenance of other plasmids is described. Various other properties of plasmids in these mutants are considered in an accompanying report (KINGSBURY, SIECKMANN and HELINSKI 1973).

#### MATERIALS AND METHODS

**Bacterial strains:** The bacterial strains used throughout this study are described in Table 1. C6000 *Flac* was obtained from M. COHEN, J5-3 (R1drd19) from E. MEYNELL via W. BELSER and J5-3 (R64drd11) from E. MEYNELL. The origin of the other strains was our own collection (HELINSKI and HERSCHMAN 1967).

The thymine-requiring mutant of JC411 ( $ColE_1$ ), DK9, was made by the procedure of

TABLE 1

*Bacterial strains and their characteristics*

| Strain                                            | Characteristics*                                                                                    | Parent strain                      |
|---------------------------------------------------|-----------------------------------------------------------------------------------------------------|------------------------------------|
| JC411                                             | His, argG, metB, Leu, malA,<br>Xyl, lacY, strA                                                      |                                    |
| JC411 ( <i>ColE</i> <sub>1</sub> )                | same as JC411 except <i>ColE</i> <sub>1</sub> + (K30)                                               | JC411                              |
| DK9                                               | same as JC411 ( <i>ColE</i> <sub>1</sub> ) except Thy <sup>-</sup>                                  | JC411 ( <i>ColE</i> <sub>1</sub> ) |
| DK100                                             | same as DK9 except Mal <sup>+</sup>                                                                 | DK9                                |
| CR34                                              | Thr, Leu, Thi, Thy, Lac                                                                             |                                    |
| CR34 ( <i>ColE</i> <sub>1</sub> )                 | same as CR34 except <i>ColE</i> <sub>1</sub> + (K30)                                                | CR34                               |
| CR34 ( <i>ColE</i> <sub>1</sub> ) ( <i>Flac</i> ) | same as CR34 ( <i>ColE</i> <sub>1</sub> ) except<br><i>Flac</i> <sup>+</sup> (C6000)                | CR34 ( <i>ColE</i> <sub>1</sub> )  |
| CR34 ( <i>ColE</i> <sub>2</sub> )                 | same as CR34 except <i>ColE</i> <sub>2</sub> +<br>( <i>Shigella</i> P9)                             | CR34                               |
| C6000 <i>Flac</i>                                 | Thr, Leu, Thi, <i>Flac</i> <sup>+</sup>                                                             |                                    |
| K30                                               | <i>ColE</i> <sub>1</sub> +, <i>ColV</i> <sup>+</sup>                                                |                                    |
| K94                                               | <i>ColV</i> <sup>+</sup>                                                                            |                                    |
| CA53                                              | <i>ColIa</i> <sup>+</sup>                                                                           |                                    |
| C600/az                                           | Thr, Leu, Thi, Lac, Az <sup>-</sup> r                                                               |                                    |
| J5-3 (R1)                                         | Pro <sup>-</sup> met <sup>-</sup> R1 <sup>+</sup> (fi <sup>+</sup> ,<br>Km, Cm, Sm, Su, Cm)         |                                    |
| J5-3 (R1drd19)                                    | same as J5-3 R1 except<br>derepressed (drd19)                                                       |                                    |
| J5-3 (R64)                                        | Pro <sup>-</sup> met <sup>-</sup> R64 <sup>+</sup> (fi <sup>-</sup> , Tc, Sm)                       |                                    |
| J5-3 (R64drd11)                                   | same as J5-3 R64 except<br>derepressed (drd11)                                                      |                                    |
| YS40                                              | His, Pro, str-r                                                                                     |                                    |
| YS40/E                                            | same as YS40 except colicin E-r                                                                     | YS40                               |
| YS40/V                                            | same as YS40 except colicin V-r                                                                     | YS40                               |
| YS40/azE                                          | same as YS40 except colicin E-r, azide-r                                                            | YS40                               |
| YS40/azV                                          | same as YS40 except colicin V-r, azide-r                                                            | YS40                               |
| Sal. LT2 ( <i>ColIb</i> )                         | <i>Salmonella typhimurium</i> LT2, <i>cysD36</i><br><i>ColIb</i> <sup>+</sup> ( <i>Shigella</i> P9) | <i>S. typhimurium</i> LT2          |

\* Unless otherwise indicated all-strains are *E. coli* derivatives. Gene symbols and usage are those suggested by TAYLOR and TROTTER (1967). Str-r and azide-r refer to resistance to streptomycin and sodium azide, respectively. Colicin E-r and V-r refer to resistance to colicin E<sub>1</sub> and colicin V, respectively. Colicinogenic factors determining the production of colicins E<sub>1</sub>, E<sub>2</sub>, V, Ia and Ib are designated *ColE*<sub>1</sub> and *ColE*<sub>2</sub>, *ColV*, *ColIa*, and *ColIb*, respectively.

SMITH (1967), utilizing the selection of spontaneous mutants by growth of the bacteria in a minimal medium containing 350 µg/ml aminopterin (kindly provided by Lederle Laboratories, Pearl River, N.Y.) and 200 µg/ml thymine. After plating and re-isolation, cells capable of growing on 2 µg/ml thymine were selected.

Strain DK100 was selected as a maltose positive revertant of DK9 which is unable to ferment maltose. DK100 simultaneously acquired sensitivity to bacteriophage λ.

**Media and growth conditions:** The defined media used throughout this study consisted of M9 phosphate buffered salts supplemented with the particular requirements for each strain. M9 salts contained the following per liter: 6.0g Na<sub>2</sub>HPO<sub>4</sub>, 3.0g KH<sub>2</sub>PO<sub>4</sub>, 5.0g NaCl, 1.0g NH<sub>4</sub>Cl, 10<sup>-3</sup>M MgSO<sub>4</sub> and 10<sup>-4</sup>M CaCl<sub>2</sub>. When amino acids were required they were added at a level of 50 µg/ml; thiamine at 2 µg/ml; and thymine was added at a level of 20 µg/ml in solid media and 2 µg/ml in liquid. Difco Vitamin-Free Casamino acids were used at a concentration of 4 g/l.

The carbon source, either glucose or glycerol, was added to a final concentration of 0.4%. When appropriate to make agar plates, Bacto Agar (Difco) was added at 17.5 g/l.

Carbohydrate fermentation was tested on MacConkey agar (Difco) containing a final concentration of 1% of the sugar or sugars to be tested.

L-medium or AB3 medium was used for the detection of colicin production and the performance of genetic crosses. L-medium consisted of 10.0 g/l tryptone (Difco), 5.0 g/l yeast extract (Difco), 5.0 g/l NaCl and 1.0 g/l glucose. The pH was adjusted to 7.0 with 5N NaOH. AB3 medium consisted of 17.5 g/l Difco Antibiotic Medium 3. For solid media 17.5 g/l Difco agar were added to the above (hard agar).

When required, antibiotics were added to the various media at the following concentrations: streptomycin 50–100  $\mu\text{g/ml}$ , chloramphenicol 10  $\mu\text{g/ml}$ , tetracycline 10  $\mu\text{g/ml}$  and sulfanilamide 20  $\mu\text{g/ml}$ . The streptomycin, tetracycline and sulfanilamide were purchased from Calbiochem; the chloramphenicol was a gift of the Parke Davis Company. Sodium azide ( $\text{NaN}_3$ ) was added to a final concentration of  $2 \times 10^{-3}$  M when required.

Cell densities were estimated from the optical densities determined with a Klett-Summerson colorimeter using a number 540 filter. One hundred Klett units corresponds to approximately  $4.5 \times 10^8$  bacteria per ml.

*Colicin assays and detection of colicinogenic colonies:* Colicin production by single colonies was assayed by stabbing each colony into a fresh AB3 plate and incubating at the appropriate temperature for 18–24 hours. The surface of this plate was then exposed to chloroform vapors for a 3 min period to kill the bacterial colonies. The plate was then overlaid with 3 ml of soft agar containing  $5 \times 10^7$  indicator bacteria, followed by an additional overnight incubation at 37°C.

The quantitative determination of transfer frequency of various *Col* factors was determined by the triple overlay techniques of FREDERICQ (1957). This procedure involves plating the colicinogenic cells in 2.5 ml of soft agar, followed by a second layer of 2.5 ml of soft agar containing no bacteria. After overnight incubation at 37°C, a third soft agar layer containing the indicator bacteria is applied and the plates are reincubated overnight. The individual colicinogenic colonies gave a clear zone in the turbid lawn of indicator cells.

*Transfer of the colicinogenic factors:* Transfer of the *ColE*<sub>1</sub> factor, which lacks sex factor activity, was promoted by either the *ColV* factor or an *Flac* factor. Log phase cultures were prepared by growth of the donor and recipient cultures in L-broth at 37°C with shaking for aeration. When the cell densities reached approximately  $5 \times 10^8/\text{ml}$ , the donor and recipient cultures were mixed in equal proportions and incubated in static culture for varying periods of time and temperature depending on the particular experiment. Generally the donor culture was either K30 or CR34 (*ColE*<sub>1</sub>) (*Flac*) which are streptomycin-sensitive. Whenever possible streptomycin counterselection was used to eliminate the donor cells. If streptomycin could not be used, then the donor cells were counterselected by starving for one or more amino acids.

The *ColE*<sub>2</sub> factor, which also lacks sex factor activity, was transferred as described by SMITH *et al.* (1963) utilizing the *ColIb* (*Shigella* P9) of *Salmonella typhimurium* LT2 (*ColIb*) to promote the transfer. The mating periods for the *ColE*<sub>2</sub> transfer varied from 30 to 90 minutes.

The *ColIV*, *ColIa*, *ColIb*, *R1* and *R64* factors were generally transferred by overnight growth of the donor and recipient culture together in static culture, followed by plating on selective agar.

*Mutagenesis and purification of the mutants:* All of the mutants isolated in this study were induced by treating the cells with N-methyl-N'-nitro-N-nitrosoguanidine (NTG). Various modifications of the method of ADELBERG, MANDEL and CHEN (1965) were used throughout.

Bacterial cultures of DK9, DK100 or CR34 (*ColE*<sub>1</sub>) were grown to mid-log phase in either L-broth or AB3 at 37°C. The cultures were aerated by vigorous shaking and were usually 10 ml in volume. At the appropriate cell density ( $5 \times 10^8/\text{ml}$ ) the culture was placed in a sterile centrifuge tube and pelleted by centrifugation at 10,000 rpm for 10 minutes in the Sorvall RC 2-B.

In the case of *short-term mutagenesis*, the pelleted bacterial cells were resuspended in 1 ml of tris-malate buffer (TM buffer, 0.2 M tris HCl, 0.2 M maleic acid, pH 6.0) and added to 9.0 ml of TM buffer containing 1 mg of NTG. This suspension was placed in a 125 ml erlenmeyer flask and shaken at 37°C for 20 minutes. At the end of this 20 minute exposure to NTG the cells were again pelleted by centrifugation.

In the case of *long-term mutagenesis*, the pelleted bacterial cells were transferred to 30 ml of AB3 and shaken for 20 minutes at 33°C. Chloramphenicol was then added to give a final concentration of 33 µg/ml and the incubation continued for 90 minutes. After this period the bacterial chromosome had stopped replication, however, *ColE<sub>1</sub>* factor replication continued (CLEWELL and HELINSKI 1972). At this point NTG was added to a final concentration of 1 mg/ml and the culture was incubated for 12 additional hours. Following this incubation the cells were pelleted by centrifugation.

Following either mutagenesis regime the pelleted bacterial cells were resuspended in M9 salts in order to wash out any remaining NTG. Following this washing, the cells were again pelleted as above.

The segregation step employed at this stage also was dependent on the type of mutation desired and on the type of mutagenesis applied. Following short-term mutagenesis the bacterial pellet was resuspended in 30 ml of M9, Casamino acids, glucose broth containing 1 µg/ml thymine and shaken at 33°C for 2 generations to allow segregation of the chromosomal mutations. Following long-term mutagenesis the cells were resuspended in 30 ml of AB3 broth and grown at 33°C. The culture was transferred several times to allow approximately 10 to 20 generations after mutagenesis. Following this segregation period, the cells were centrifuged to remove the rich medium. One-third of a 30 ml culture was resuspended in M9, Casamino acids, glucose medium.

At this stage all of the cultures were handled similarly, regardless of the mutagenic regime used. The cultures were adjusted to approximately 50 to 70 Klett units and the level of thymine adjusted to 1 µg/ml. The cultures were shifted to a water bath shaker at 43°C and shaken for 90 minutes. Chloramphenicol was then added to a final concentration of 33 µg/ml and the cultures shaken for an additional 90 minutes. After this period in chloramphenicol, replication of the bacterial chromosome stopped. 5-Bromouracil (BU) was then added at a final concentration of 300 µg/ml, which was 300 fold the concentration of thymine in the medium. At this stage the flasks were wrapped in aluminum foil to prevent any exposure to light.

The cultures, still at 43°C, were shaken for an additional 10–15 hours to allow maximum replication of the *ColE<sub>1</sub>* plasmid in BU. Following this incubation the 30 ml of culture was centrifuged at 10,000 rpm for 10 minutes to pellet the cells. The bacteria were then resuspended in 1 ml of M9 salts and placed as a drop in the center of a sterile plastic petri dish. On top of this petri dish containing the 1 ml of cell suspension was placed another petri dish containing 50 ml of a saturated solution of thymine in water. Finally, this plate usually was covered by a third glass petri dish of water. A high-intensity white light source, either a 250 watt heat lamp or an 8 watt fluorescent lamp, was placed 18 inches or 6 inches, respectively, from the surface of the petri dish of water. The light was used to irradiate the BU-labeled culture for 20 minutes. This 1 ml bacterial suspension was then placed in AB3 broth for 4–8 hours of growth at 33°C. Following this growth period the culture was diluted and plated on AB3 agar at 33°C. The dilutions plated were designed to give the maximum number of well-isolated colonies per plate. The resulting colonies were then tested for their temperature sensitivity for growth at 43°C and for colicin production at 43°C and 33°C. Those colonies which grew well and produced colicin at 33°C but not 43°C were tentatively identified as mutants and selected for further study.

Single colonies were checked for the presence of mutations and mutant clones were restreaked twice to insure purity. The mutant and parent stocks were routinely stored by stabbing into deeps of AB3 medium containing 0.9% Difco Agar.

## RESULTS

*Isolation and gross localization of mutants temperature sensitive for the replication of ColE<sub>1</sub>:* The large number of copies of *ColE<sub>1</sub>* DNA per chromosome (approximately 10–15) (CLEWELL and HELINSKI 1972) necessitated the development of a technique that was capable of enriching for a mutation that might occur in only one of the 15 copies. The procedure described in MATERIALS AND METHODS is basically an adaptation of the BU-incorporation procedure of BONHOEFFER and SCHALLER (1965). The starting cultures were either DK9, DK100

## MASTER PLATE

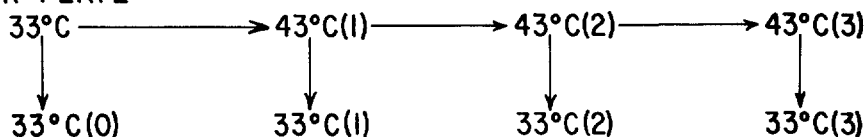

FIGURE 1.—Plate screening procedure for determining the loss of bacterial plasmids. The passage numbering system designates the number of exposures to 43°C. In every case the passages at 43°C were done under non-selective plating conditions to allow either free expression or loss of the plasmid markers.

or CR34 (*ColE*<sub>1</sub>), all of which are *E. coli* K12 strains that contain the plasmid *ColE*<sub>1</sub> and require thymine for growth. DK100, a derivative of DK9, is sensitive to coliphage λ and is the parent of most of the host mutants isolated in this study.

Two mutagenic procedures were used, each designed to give a particular class of mutants. "Short-term" mutagenesis was designed to give predominantly mutations which lie on the bacterial chromosome, while "long-term" mutagenesis was designed to give almost entirely mutations on the *ColE*<sub>1</sub> factor itself.

The frequency of recovery of mutants varied widely between experiments. The highest rate in any experiment was one mutant colony in 10, while the lowest rate in any experiment was 1 in 300. To avoid the isolation of more than one descendent of a single mutant, no two mutants from the same mutagenic treatment and selection were kept unless each demonstrated unique phenotypic properties in one or more of the screening procedures.

Every prospective mutant was isolated because of its ability to produce a detectable zone of colicin at the non-permissive temperature. To establish that these isolates were in fact maintenance mutants rather than colicin induction mutants or colicin structural mutants the screening procedure outlined in Figure 1 was adopted. This test is based on the expected irreversible loss of the *ColE*<sub>1</sub> factor at high temperature in a plasmid replication mutant. Each mutant was stabbed into an AB3 plate at 33°C and 43°C and grown overnight. The colony from the 43°C plate was passed to a second 43°C plate and a 33°C plate by picking from the colony edge with a sterile toothpick and stabbing into the two new plates. The parent colony was chloroform-treated and overlaid with indicator bacteria. The procedure was continued for 3 passages at 43°C to allow dilution of the copies of the *ColE*<sub>1</sub> factor from the population following the termination of replication. Every mutant that lost the ability to produce colicin at 33°C following passage at 43°C was tentatively considered a replication mutant. Although this criterion does not distinguish between replication and segregation mutants, it was found that all of the mutants isolated when tested, subsequently, for *ColE*<sub>1</sub> DNA synthesis and the rate of formation of non-colicinogenic cells in cultures incubated at 43°C, behaved as replication mutants.

Temperature-sensitive mutants were initially characterized with respect to whether the mutational site was present on the host chromosome or on the *ColE*<sub>1</sub> plasmid. This was readily determined by examining the mutant strains for the co-transfer of the temperature-sensitive replication property and the *ColE*<sub>1</sub> plas-

mid. The *ColE<sub>1</sub>* factor lacks sex factor activity and, therefore, transfer of the factor requires the presence of a sex factor plasmid element in the donor cell. The system utilized in this study was to promote *ColE<sub>1</sub>* transfer with an *Flac* factor. To avoid complications due to the presence of a second plasmid, recipients were examined that received the *ColE<sub>1</sub>* plasmid but not the *Flac* factor. The advantage of this system is that when a *Lac<sup>-</sup>* female is used, those colonies which have received only *ColE<sub>1</sub>* can be easily differentiated from those receiving both *ColE<sub>1</sub>* and *Flac* by plating on MacConkey agar containing lactose. In addition, under the conditions employed, the transfer frequency of the *Flac* factor was low.

Each DK9 or DK100 mutant strain was crossed with C6000 *Flac. Lac<sup>+</sup>* and streptomycin-resistant colonies were selected from this cross on MacConkey agar containing lactose and streptomycin. The mutant strains carrying the *Flac* plasmid were then crossed with CR34 for 3–5 hours and the DK9 or DK100 donors were counter-selected nutritionally by the omission of histidine, methione and arginine from the medium. The colicinogenic CR34 isolates resulting from the cross were checked, subsequently, for the temperature sensitivity of *ColE<sub>1</sub>* replication and the presence of *Flac*. The results of these experiments are shown in Table 2. Those *ColE<sub>1</sub>* plasmids, which in the absence of *Flac* failed to show any temperature sensitivity, were considered normal and therefore it was concluded

TABLE 2  
*Gross localization of the mutational site*

| Isolate number                                                                                                             | Parent strain                                    | Method of mutagenesis* | Site of mutation        |
|----------------------------------------------------------------------------------------------------------------------------|--------------------------------------------------|------------------------|-------------------------|
| 13, 14, 18, 19, 20, 22<br>23, 24, 25, 28, 30, 21                                                                           | DK9                                              | Short-term             | Chromosome              |
| 29, 32, 34, 35, 36, 37<br>46, 49, 59, 61a, 62<br>63, 64, 65, 66, 67,<br>68, 70, 71, 72, 73a,                               | DK9                                              | Short-term             | <i>ColE<sub>1</sub></i> |
| 75, 76, 77, 78a, 79,<br>80a, 81, 82, 83, 84,<br>86, 87, 88, 89, 91, 100<br>107a, 109a, 119a, 126a,<br>126b, 128, 129a, 131 | DK9                                              | Long-term              | <i>ColE<sub>1</sub></i> |
| 160, 164, 166, 171<br>191, 192, 201, 203,<br>203, 211, 213, 214,<br>215, 216, 218, 221,                                    | CR34 ( <i>Flac</i> ) ( <i>ColE<sub>1</sub></i> ) | Short-term             | Chromosome              |
| 223, 224, 225, 226,<br>227, 228, 231, 232,<br>233, 234, 235, 236,<br>237.                                                  | DK100                                            | Short-term             | Chromosome              |

\* The short-term and long-term mutagenesis procedures are described in MATERIALS AND METHODS.

TABLE 3

*Maintenance of extrachromosomal elements at 43°C in the chromosomal-located mutants*

| Mutant number                                                                                 | Extrachromosomal element | Expression of the plasmid element* |       |                                     |       |       |       |       |
|-----------------------------------------------------------------------------------------------|--------------------------|------------------------------------|-------|-------------------------------------|-------|-------|-------|-------|
|                                                                                               |                          | 33(0)                              | 43(1) | 33(1)                               | 43(2) | 33(2) | 43(3) | 33(3) |
| 13, 18                                                                                        | ColE <sub>1</sub>        | +                                  | —     | +                                   | —     | —     | —     | —     |
|                                                                                               | ColE <sub>2</sub>        | +                                  | —     | +                                   | —     | ±     | —     | —     |
|                                                                                               | ColIV                    | +                                  | —     | —                                   | —     | —     | —     | —     |
|                                                                                               | Flac                     | +                                  | —     | —                                   | —     | —     | —     | —     |
|                                                                                               | ColIa                    | +                                  | +     | +                                   | +     | +     | +     | +     |
|                                                                                               | ColIb                    | +                                  | +     | +                                   | +     | +     | +     | +     |
|                                                                                               | R1drd19                  | +                                  | —     | —                                   | —     | —     | —     | —     |
|                                                                                               | R64                      | +                                  | +     | +                                   | +     | +     | +     | +     |
| 14, 19,<br>23, 24,<br>25, 28,<br>30, 31,<br>33, 192,<br>203, 223,<br>234                      | ColE <sub>1</sub>        | +                                  | —     | —                                   | —     | —     | —     | —     |
|                                                                                               | ColIV                    | +                                  | —     | —                                   | —     | —     | —     | —     |
|                                                                                               | Flac                     | +                                  | —     | —                                   | —     | —     | —     | —     |
|                                                                                               | ColIa                    | +                                  | +     | +                                   | +     | +     | +     | +     |
|                                                                                               | ColIb                    | +                                  | +     | +                                   | +     | +     | +     | +     |
|                                                                                               | R1drd19                  | +                                  | —     | —                                   | —     | —     | —     | —     |
|                                                                                               | R64                      | +                                  | +     | +                                   | +     | +     | +     | +     |
|                                                                                               | R64                      | +                                  | +     | +                                   | +     | +     | +     | +     |
| 20, 191,<br>236, 237                                                                          | ColE <sub>1</sub>        | +                                  | —     | —                                   | —     | —     | —     | —     |
|                                                                                               | ColIV                    | +                                  | —     | —                                   | —     | —     | —     | —     |
|                                                                                               | Flac                     | +                                  | —     | —                                   | —     | —     | —     | —     |
|                                                                                               | ColIa                    | +                                  | —     | —                                   | —     | —     | —     | —     |
|                                                                                               | ColIb                    | +                                  | —     | —                                   | —     | —     | —     | —     |
|                                                                                               | R1drd19                  | +                                  | —     | —                                   | —     | —     | —     | —     |
|                                                                                               | R64                      | +                                  | —     | —                                   | —     | —     | —     | —     |
|                                                                                               | R64                      | +                                  | —     | —                                   | —     | —     | —     | —     |
| 22, 45                                                                                        | ColE <sub>1</sub>        | +                                  | —     | ±                                   | —     | —     | —     | —     |
|                                                                                               | ColE <sub>2</sub>        | +                                  | —     | +                                   | —     | ±     | —     | —     |
|                                                                                               | ColIV                    | +                                  | —     | —                                   | —     | —     | —     | —     |
|                                                                                               | Flac                     | +                                  | —     | —                                   | —     | —     | —     | —     |
|                                                                                               | ColIa                    | +                                  | —     | —                                   | —     | —     | —     | —     |
|                                                                                               | ColIb                    | +                                  | —     | —                                   | —     | —     | —     | —     |
|                                                                                               | R1drd19                  | +                                  | —     | —                                   | —     | —     | —     | —     |
|                                                                                               | R64                      | +                                  | —     | —                                   | —     | —     | —     | —     |
| 164, 166, 171,<br>201, 205, 211,<br>215, 218, 221,<br>225, 226, 227,<br>231, 232, 233,<br>235 | ColE <sub>1</sub>        | +                                  | —     | —                                   | —     | —     | —     | —     |
|                                                                                               | ColIV                    | +                                  | +     | +                                   | +     | +     | +     | +     |
|                                                                                               | Flac                     | +                                  | +     | +                                   | +     | +     | +     | +     |
|                                                                                               | ColIb                    | +                                  | +     | +                                   | +     | +     | +     | +     |
|                                                                                               | R1drd19                  | +                                  | +     | +                                   | +     | +     | +     | +     |
|                                                                                               | R64                      | +                                  | +     | +                                   | +     | +     | +     | +     |
|                                                                                               | R64                      | +                                  | +     | +                                   | +     | +     | +     | +     |
|                                                                                               | R64                      | +                                  | +     | +                                   | +     | +     | +     | +     |
| 213, 214,<br>228                                                                              | ColE <sub>1</sub>        | +                                  | —     | +                                   | —     | —     | —     | —     |
|                                                                                               | ColIV                    | +                                  | +     | +                                   | +     | +     | +     | +     |
|                                                                                               | Flac                     | +                                  | —     | unable to grow on MacConkey at 43°C |       |       |       |       |
|                                                                                               | ColIb                    | +                                  | +     | +                                   | +     | +     | +     | +     |
|                                                                                               | R1drd19                  | +                                  | +     | continued growth poor at 43°C       |       |       |       |       |
|                                                                                               | R64                      | +                                  | +     | continued growth poor at 43°C       |       |       |       |       |



| Mutant number | Extrachromosomal element | Expression of the plasmid element* |       |       |       |       |          |       |
|---------------|--------------------------|------------------------------------|-------|-------|-------|-------|----------|-------|
|               |                          | 33(0)                              | 43(1) | 33(1) | 43(2) | 33(2) | 43(3)    | 33(3) |
| 214, 216      | <i>ColE<sub>1</sub></i>  | +                                  | —     | —     | —     | —     | —        | —     |
|               | <i>ColE<sub>2</sub></i>  | +                                  | +     | +     | +     | +     | not done |       |
|               | <i>ColV</i>              | +                                  | +     | +     | +     | +     | +        | +     |
|               | <i>Flac</i>              | +                                  | +     | +     | +     | +     | +        | +     |
|               | <i>ColIb</i>             | +                                  | +     | +     | +     | +     | +        | +     |
|               | <i>R1drd19</i>           | +                                  | +     | +     | +     | +     | +        | +     |
|               | <i>R64</i>               | +                                  | +     | +     | +     | +     | +        | +     |

\* The designation of passages is described in Figure 1. (+) refers to the positive expression of detectable plasmid genes and (—) refers to no detectable plasmid functions.

that in those cases the temperature-sensitive mutation in the original colicinogenic strain was on the bacterial chromosome. The chromosome location of many, but not all, of these mutants was corroborated by temperature-curing the mutants for the *ColE<sub>1</sub>* plasmid and crossing a wild-type *ColE<sub>1</sub>* into the cells.

In every cross testing for the gross localization of the mutations 25 to 100 colonies were examined. There was considerable heterogeneity in the behavior of those colonies derived from parents resulting from the long-term mutagenesis. This led to the conclusion that the long-term mutagenesis produced cells carrying a mixed population of plasmid molecules with respect to their temperature sensitivity and, therefore, before these mutants could be studied as a homogeneous population, the *ColE<sub>1</sub>* factors had to be transferred into a new host. The temperature sensitive CR34 (*ColE<sub>1</sub>*) colonies which resulted from the crosses with the mutants behaved as homogeneous populations and are the plasmid mutant strains used in the remainder of this study. With only six exceptions (see Table 2) all of the plasmid-located mutations were derived as a result of the long-term mutagenesis procedure and none of the chromosomally located mutations were isolated by the long-term procedure.

*Properties of the chromosome-located mutants:* The separation of the mutants into two clearly defined groups indicated that it was possible to isolate a number of chromosomal mutations which, although resulting in defective *ColE<sub>1</sub>* replication, did not interfere with chromosome replication. Additional experiments were designed to examine the specificity of these mutations with respect to other plasmids and also the complementation of these mutations by other extrachromosomal elements.

A variety of extrachromosomal elements were introduced into the chromosomal-located mutants and the replication of these elements and their effect on *ColE<sub>1</sub>* replication was examined. Every mutant strain examined, as shown in Table 3, contained either *ColE<sub>1</sub>* alone, or *ColE<sub>1</sub>* plus the plasmid element to be tested. The only exception is *ColE<sub>2</sub>* which was introduced into mutants which had been cured of *ColE<sub>1</sub>* by growth at 43°C.

In no case did any of the plasmid elements tested complement the chromosome-located mutations and allow *ColE<sub>1</sub>* to replicate. The plasmids examined fell into two sex factor and four compatibility classes. The F-type class included *ColV*,

*Flac* and *R1drd19*. *R1drd19* is able to co-exist in the same cell as an *F*<sub>1</sub>, or *F'* factor, whereas *ColIV* and *Flac* are incompatible. The *ColI*-type plasmids included *ColIa*, *ColIb* and *R64*. *ColIa* and *ColIb* are incompatible, whereas *R64* is able to co-exist with either of the *ColI* factors (Novick 1969).

As summarized in Table 4 the chromosome-located mutants fall into three well-defined specificity classes. The classes vary in their ability to replicate the different sex-pilus-type factors. Group I mutants were defective in the replication of all of the extrachromosomal elements examined. Group II mutants were normal only with respect to the I-type plasmids. Mutants of group III were defective specifically for *ColE*<sub>1</sub> replication.

A select number of the mutants were tested to determine whether or not a single mutational event was responsible for the temperature-sensitive replication patterns observed. Cultures of various mutants were grown for several generations in AB3 broth at 43°C. This period of growth at the restrictive temperature results in the segregation of the *ColE*<sub>1</sub> plasmid and, correspondingly, loss of

TABLE 4  
*Classification of chromosomal mutants by phenotypic groups*

| Plasmid                  | Pilus type | Mutant class   |        |       |
|--------------------------|------------|----------------|--------|-------|
|                          |            | I              | II     | III   |
| <i>ColE</i> <sub>1</sub> | None       | ts*            | ts     | ts    |
| <i>ColE</i> <sub>2</sub> | None       | ts             | ts     | wt    |
| <i>Flac, ColIV, R1</i>   | F          | ts             | ts     | wt    |
| <i>ColIb, R64</i>        | I          | ts             | wt     | wt    |
|                          |            | Mutant numbers |        |       |
|                          |            | TS20           | TS13** | TS164 |
|                          |            | 22**           | 14     | 166   |
|                          |            | 45**           | 18**   | 171   |
|                          |            | 191            | 19     | 201   |
|                          |            | 236            | 23     | 205** |
|                          |            | 237            | 25     | 211   |
|                          |            |                | 28     | 213   |
|                          |            |                | 30     | 214** |
|                          |            |                | 31     | 215   |
|                          |            |                | 33     | 216** |
|                          |            |                | 160    | 218   |
|                          |            |                | 192    | 221   |
|                          |            |                | 203    | 224   |
|                          |            |                | 223    | 225   |
|                          |            |                | 234    | 226   |
|                          |            |                |        | 227   |
|                          |            |                |        | 228   |
|                          |            |                |        | 231   |
|                          |            |                |        | 232   |
|                          |            |                |        | 233   |
|                          |            |                |        | 235   |

\* ts and wt refer to temperature-sensitive and wild-type, respectively.

\*\* Only these mutants were examined for their ability to replicate *ColE*<sub>2</sub>.

TABLE 5

*Maintenance of plasmids at 43°C in revertants of host mutants*

| Mutant number | Group | Number tested | Plasmid                 | Expression of the plasmid element* |       |       |       |       |       |       |
|---------------|-------|---------------|-------------------------|------------------------------------|-------|-------|-------|-------|-------|-------|
|               |       |               |                         | 33(0)                              | 43(1) | 33(1) | 43(2) | 33(2) | 43(3) | 33(3) |
| TS13          | II    | 5             | <i>ColE<sub>1</sub></i> | +                                  | +     | +     | +     | +     | +     | +     |
|               |       |               | <i>ColV</i>             | +                                  | +     | +     | +     | +     | +     | +     |
|               |       |               | <i>Flac</i>             | +                                  | +     | +     | +     | +     | +     | +     |
| TS22          | I     | 50            | <i>ColE<sub>1</sub></i> | +                                  | +     | +     | +     | +     | +     | +     |
|               |       |               | <i>ColV</i>             | +                                  | +     | +     | +     | +     | +     | +     |
|               |       |               | <i>Flac</i>             | +                                  | +     | +     | +     | +     | nt    | nt    |
|               |       |               | <i>ColIa</i>            | +                                  | +     | +     | +     | +     | nt    | nt    |
|               |       |               | <i>R1drd19</i>          | +                                  | +     | +     | +     | +     | nt    | nt    |
|               |       |               | <i>R64</i>              | +                                  | +     | +     | +     | +     | nt    | nt    |
| TS24          | II    | 5             | <i>ColE<sub>1</sub></i> | +                                  | +     | +     | +     | +     | +     | +     |
|               |       |               | <i>ColV</i>             | +                                  | +     | +     | +     | +     | +     | +     |
| TS30          | II    | 25            | <i>ColE<sub>1</sub></i> | +                                  | +     | +     | +     | +     | +     | +     |
|               |       |               | <i>ColV</i>             | +                                  | +     | +     | +     | +     | nt    | nt    |
|               |       |               | <i>Flac</i>             | +                                  | +     | +     | +     | +     | nt    | nt    |
|               |       |               | <i>R1drd19</i>          | +                                  | +     | +     | +     | +     | nt    | nt    |

\* The designation of passages is described in Figure 1. nt indicates not tested. (+) refers to the positive expression of plasmid functions.

immunity to colicin  $E_1$ . The loss of immunity results in death of the cell due to the colicin  $E_1$  present in the culture and an enrichment of revertant cells in the population. After 10 to 15 generations the culture was plated for isolated colonies. These colonies were screened for revertants or cells that were now able to produce colicin  $E_1$  at 43°C. Many of the resulting colonies, including representatives of all three phenotypic groups, were examined for the replication of other extra-chromosomal elements. These data are given in Table 5. In every case examined, the maintenance of other plasmid elements was normal at 43°C. From the reversion data presented here it is likely that in most cases the pleiotropic effect of the mutation with respect to plasmid specificity is due to a single mutational event.

*Properties of those mutants located on the ColE<sub>1</sub> plasmid:* The transfer of the mutant *ColE<sub>1</sub>* plasmid molecules from DK9 to CR34 resulted in colicinogenic CR34 cells that exhibited a wide variety of temperature-sensitive phenotypes. A likely interpretation of this result was that the original DK9 mutant strain contained a mixture of mutant and wild-type *ColE<sub>1</sub>* plasmid molecules. The results of the transfer experiments indicated that the population of *ColE<sub>1</sub>* molecules in the CR34 cells derived from the cross with the DK9 (*Flac*) mutants was very homogeneous in any single colony isolate, suggesting that during transfer only a single copy of the *ColE<sub>1</sub>* molecule is transferred. The necessity for a homogeneous population of plasmid molecules for the proper analysis of the nature of the temperature-sensitive mutation required that further studies on these mutants employ the temperature-sensitive CR34 (*ColE<sub>1</sub>*) mutant strains.

TABLE 6

*Maintenance of ColE<sub>1</sub> in plasmid-located mutants*

| Mutant number                                                                                       | Presence of <i>Flac</i> | Maintenance of ColE <sub>1</sub> * |       |              |       |       |       |       |
|-----------------------------------------------------------------------------------------------------|-------------------------|------------------------------------|-------|--------------|-------|-------|-------|-------|
|                                                                                                     |                         | 33(0)                              | 43(1) | 33(1)        | 43(2) | 33(2) | 43(3) | 33(3) |
| 29, 35, 36, 37, 59, 65,<br>89, 126a, 126b, 128, 129a, 131                                           | —<br>+                  | +                                  | ±     | +            | ±     | ±     | —     | —     |
| 32                                                                                                  | —<br>+                  | +                                  | ±     | +            | +     | +     | —     | —     |
|                                                                                                     |                         |                                    |       | not examined |       |       |       |       |
| 34, 49, 62, 63, 64, 66,<br>68, 70, 71, 73a, 76, 77,<br>80a, 81, 83, 86, 87, 91,<br>107a, 109a, 119a | —<br>+                  | +                                  | —     | —            | —     | —     | —     | —     |
| 45, 46,<br>61, 79                                                                                   | —<br>+                  | +                                  | —     | —            | —     | —     | —     | —     |
|                                                                                                     |                         |                                    |       | not examined |       |       |       |       |
| 67, 72                                                                                              | —<br>+                  | +                                  | —     | —            | —     | —     | —     | —     |
|                                                                                                     |                         |                                    |       | not examined |       |       |       |       |
| 75, 78a,<br>82, 84, 88                                                                              | —<br>+                  | +                                  | —     | —            | —     | —     | —     | —     |
|                                                                                                     |                         | +                                  | +     | +            | +     | +     | +     | +     |

\* Passage designations are described in Figure 1. (+) and (—) refer to the positive and negative expression of plasmid functions, respectively.

The rate of loss of the ColE<sub>1</sub> plasmid and the effect of the presence of the *Flac* sex factor genes on the loss of the plasmid were examined in the CR34 derivatives. Table 6 gives the results of these experiments. The rate of loss of ColE<sub>1</sub> by the plasmid mutants is generally somewhat slower than from the chromosomal mutants under the conditions employed. The presence of the *Flac* factor had little or no effect on the replication of the ColE<sub>1</sub> factor in the case of all of the plasmid mutants except for TS75, TS78A, TS82, TS84 and TS88, where the *Flac* appeared to complement the ColE<sub>1</sub> mutation and permit replication at the non-permissive temperature.

In the course of these plate screening experiments the effect of inhibition of plasmid replication on the growth of a cell in certain cases was apparent. Some of the plasmid mutants grew very poorly on the plates at the nonpermissive temperature for one or two plate passages. When cured (ColE<sub>1</sub><sup>−</sup>) cells began to appear, the growth rate began to approach that of the wild-type cells.

#### DISCUSSION

The isolation of mutants of *E. coli* defective in ColE<sub>1</sub> DNA synthesis was made possible by the ability of the cell to replace thymine with BU in the DNA and to replicate ColE<sub>1</sub> in the absence of protein synthesis. The use of BU to isolate DNA synthesis mutants was first exploited by BONHOEFFER and SCHALLER

(1965) who showed that the incorporation of BU into chromosomal DNA was a lethal event when the cells were exposed, subsequently, to long-wave-length ultraviolet light. The ability of *ColE<sub>1</sub>* to continue replication for at least several hours following the cessation of protein synthesis was critical to the success of the isolation procedure. Unfortunately, this aspect of the procedure does not make it broadly applicable to all bacterial plasmids since synthesis of at least certain other *E. coli* plasmids stops more quickly following chloramphenicol treatment. The *F<sub>1</sub>* factor probably initiates, on the average, less than one additional round of replication (BAZARAL and HELINSKI 1970), and the *ColI* factors appear to be very similar in this respect after the addition of chloramphenicol. The possible use of chromosomal DNA synthesis mutants which allow F factor replication (e.g. CRT46) (HIROTA *et al.* 1968) has not been fully explored but is potentially useful for the isolation of temperature-sensitive mutants of other *E. coli* plasmids by a procedure similar to that employed in this study.

Not unexpectedly, the *ColE<sub>1</sub>* replication mutants fell into two groups with respect to the location of the mutational site—chromosomal and plasmid. Those mutants obtained from long-term mutagenesis appeared to contain not one type of mutant *ColE<sub>1</sub>* plasmid molecule per cell, but a mixture of wild-type and mutant plasmid molecules. This was observed in nearly every strain isolated from the long-term procedure and several isolates showed as many as six phenotypes following transfer to CR34. Often a CR34 recipient cell received a *ColE<sub>1</sub>* plasmid that did not demonstrate a temperature-sensitive phenotype, whereas the parent strain had. This suggests that there may have been wild-type plasmid molecules in the original mutant cells which were unable to complement the temperature-sensitive mutants. The failure to complement may have been due to their small number or due to the nature of the temperature-sensitive mutation itself. The demonstration of the multiple phenotypes resulting from long-term mutagenesis and the homogeneous behavior of the CR34 (*ColE<sub>1</sub>*) strains resulting from the transfer experiments suggest that only a single type of *ColE<sub>1</sub>* molecule was transferred to the female cell during mating.

On the basis of the ability or inability of *Flac* to provide the necessary replication function, the plasmid mutants fell into two categories: those mutations which are unique to *ColE<sub>1</sub>* and cannot be complemented by *Flac* and those mutations which involve functions that are common to both *Flac* and *ColE<sub>1</sub>* and can be supplied by either. This type of study yields only a minimum number of classes and a more careful study with other factors may be necessary to obtain a further subclassification of the mutants.

The host mutants can be divided functionally into three classes, based on the replication of plasmids of various sex factor types. Mutants of the first group are defective in the replication of all the bacterial plasmids tested. Preliminary studies have shown that at least two group I mutants (TS22 and TS45) will not allow replication of temperate bacteriophages  $\lambda$  and P1 at 43°C while they will allow growth of bacteriophage T4 at the restrictive temperature.

The group II mutants allow the normal replication of the plasmids of the *ColI* type but the replication of other plasmids is defective. The restriction of repli-

cation of the F-type plasmids does not follow the patterns of compatibility but does follow the sex pilus type. The group III mutants appear to affect only *ColE<sub>1</sub>*. Although not all of this group have been tested for *ColE<sub>2</sub>* replication, those that have were found to replicate *ColE<sub>2</sub>* normally. The group III mutants have been further subdivided into two functionally distinct groups based on the thermal lability of their DNA polymerase I. It has been demonstrated that the *ColE<sub>1</sub>* factor is not maintained in a mutant lacking DNA polymerase I activity (*polA1*), whereas all other bacterial plasmids tested are maintained normally in this mutant (KINGSBURY and HELINSKI 1970). When the group III mutants were examined for their DNA polymerase I activity some (group IIIa) exhibited a temperature-sensitive DNA polymerase I while others were normal for this property (group IIIb) (KINGSBURY and HELINSKI 1973). Other properties of the various mutants in the three groups are described in an accompanying communication (KINGSBURY, SIECKMANN and HELINSKI 1973).

#### LITERATURE CITED

- ADELBERG, E. A., M. MANDEL and C. C. CHEN, 1965 Optimal conditions for mutagenesis by N-methyl-N'-nitro-N-nitrosoguanidine in *Escherichia coli* K-12. *Biochem. Biophys. Res. Commun.* **18**: 788-795.
- BAZARAL, M. and D. R. HELINSKI, 1968 Circular DNA forms of colicinogenic factors E<sub>1</sub>, E<sub>2</sub> and E<sub>3</sub> from *Escherichia coli*. *J. Mol. Biol.* **36**: 185-194. —, 1970 Replication of a bacterial plasmid and an episome in *Escherichia coli*. *Biochem.* **9**: 399-406.
- BONHOEFFER, F. and H. SCHALLER, 1965 A method for selective enrichment of mutants based on the high U.V. sensitivity of DNA containing 5-Bromouracil. *Biochem. Biophys. Res. Commun.* **20**: 93-97.
- CLEWELL, D. B. and D. R. HELINSKI, 1969 Supercoiled circular DNA-protein complex in *Escherichia coli*: purification and induced conversion to an open circular DNA form. *Proc. Nat. Acad. Sci. U.S.* **62**: 1159-1166. —, 1970 Properties of a supercoiled DNA-protein relaxation complex and strand specificity of the relaxation event. *Biochem.* **9**: 4428-4440. —, 1972 Effect of growth conditions on the formation of the relaxation complex of supercoiled *ColE<sub>1</sub>* DNA and protein in *Escherichia coli*. *J. Bacteriol.* **110**: 1135-1146.
- CUZIN, F. and F. JACOB, 1967 Mutations de l'episome *F* d'*Escherichia coli* K-12. II. Mutants à répllication thermosensible. *Ann. Inst. Pasteur* **112**: 397-418.
- FREDERICQ, P., 1957 Colicins. *Ann. Rev. Microbiol.* **11**: 7-22.
- GOEBEL, W., 1970 Studies on extrachromosomal DNA elements: replication of the colicinogenic factor E<sub>1</sub> in two temperature sensitive mutants of *Escherichia coli* defective in DNA replication. *Eur. J. Biochem.* **15**: 311-320.
- HELINSKI, D. R. and H. R. HERSCHMAN, 1967 Effect of Rec<sup>-</sup> Mutations on the Activity of Colicinogenic Factors. *J. Bacteriol.* **94**: 700-706.
- HIROTA, Y., F. JACOB, A. RYTER, G. BUTTIN and T. NAKAI, 1968 On the process of cellular division in bacteria. I. Assymetrical cellular division and DNA-less bacteria in *Escherichia coli*. *J. Mol. Biol.* **35**: 175-192.
- JACOB, F., S. BRENNER and F. CUZIN, 1963 On the regulation of DNA synthesis in bacteria. *Cold Spring Harbor Symp. Quant. Biol.* **28**: 329-348.
- KINGSBURY, D. T. and D. R. HELINSKI, 1970 DNA polymerase as a requirement for the maintenance of the bacterial plasmid colicinogenic factor E<sub>1</sub>. *Biochem. Biophys. Res. Commun.* **41**: 1538-1544. —, 1973 Temperature-sensitive mutants for the replication

- of plasmids in *Escherichia coli*: Requirement for DNA polymerase I in the replication of the plasmid *ColE<sub>1</sub>*. J. Bacteriol. (in press).
- KINGSBURY, D. T. and D. G. SIECKMANN, 1973 Temperature-sensitive mutants for the replication of plasmids in *Escherichia coli*. II. Properties of host and plasmid mutations. Genetics (this issue).
- NOVICK, R., 1969 Extrachromosomal inheritance in bacteria. Bacteriol. Rev. **33**: 210-263.
- SMITH, J. T., 1967 Production of thymineless mutants in gram-negative bacteria. J. Gen. Microbiol. **47**: 131-137.
- SMITH, S. M., H. OZEKI and B. A. D. STOCKER, 1963 Transfer of *ColE<sub>1</sub>* and *ColE<sub>2</sub>* during high-frequency transmission of *Col1* in *Salmonella typhimurium*. J. Gen. Microbiol. **33**: 231-242.
- TAYLOR, A. L. and C. D. TROTTER, 1967 Revised linkage map of *Escherichia coli*. Bact. Rev. **31**: 332-353.
